# Supplementary material for: CAG-encoded polyglutamine length polymorphism in the human genome
Source: PubMed Central journal article supplement (PMC1896166; doi:10.1186/1471-2164-8-126), 2007-05-22
Supplement: 1471-2164-8-126-S2.pdf [file 1471-2164-8-126-S2.pdf]

Wild-type allele distributions for 64 polyglutamine-encoding CAG trinucleotide repeat targets.

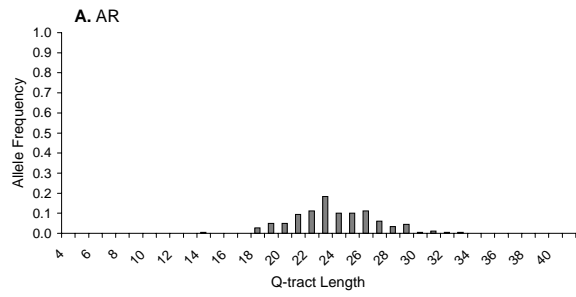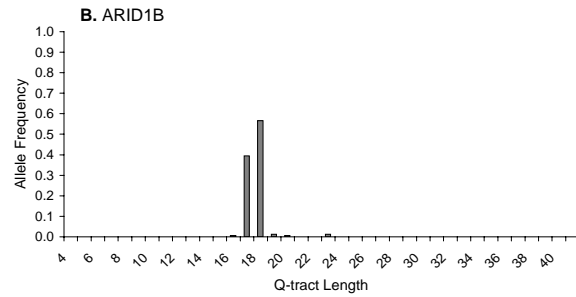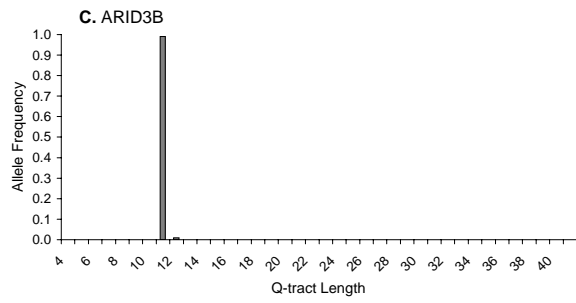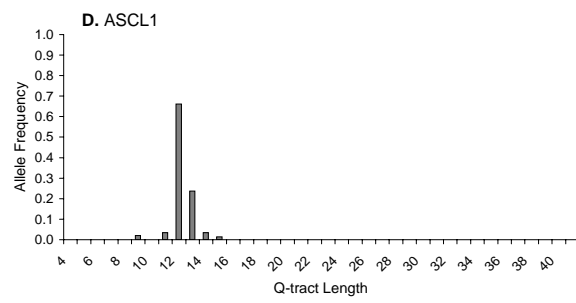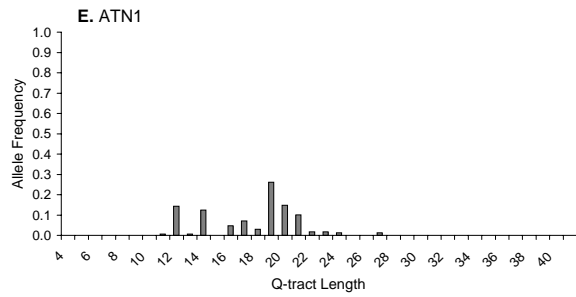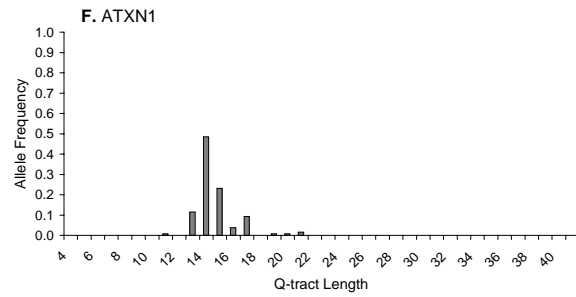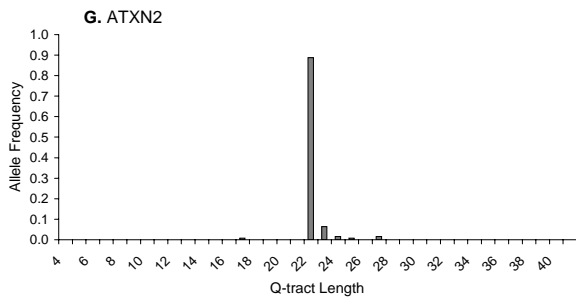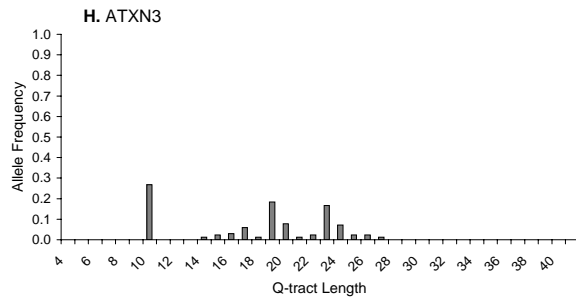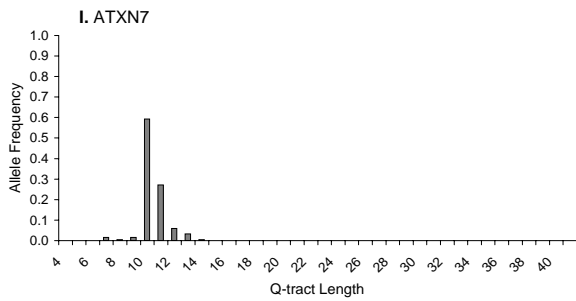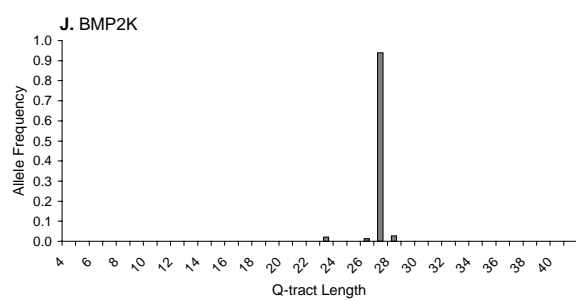

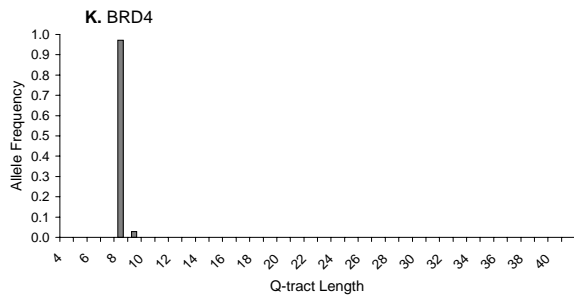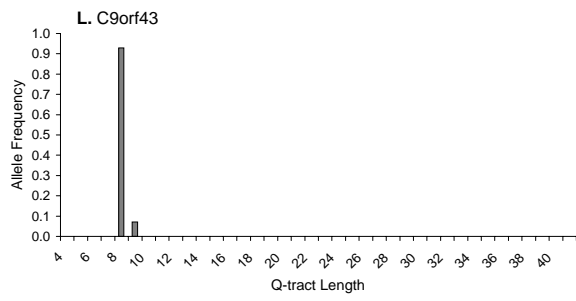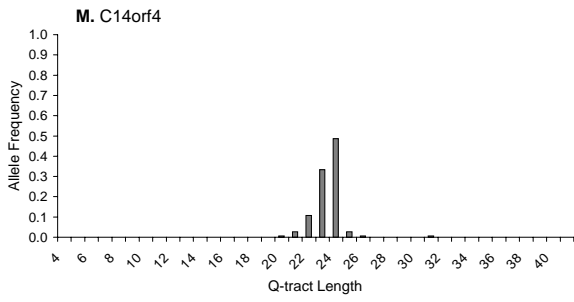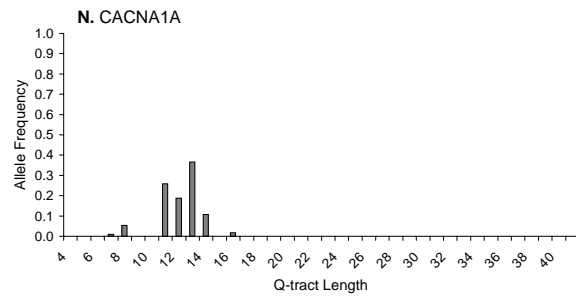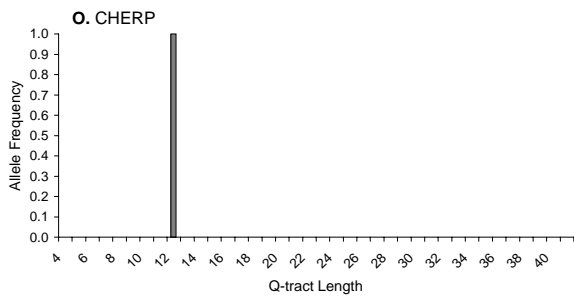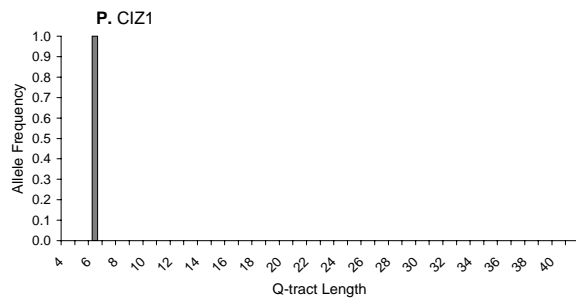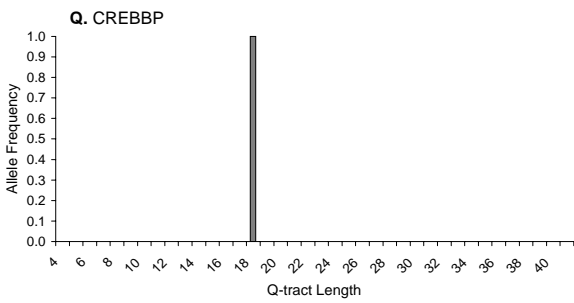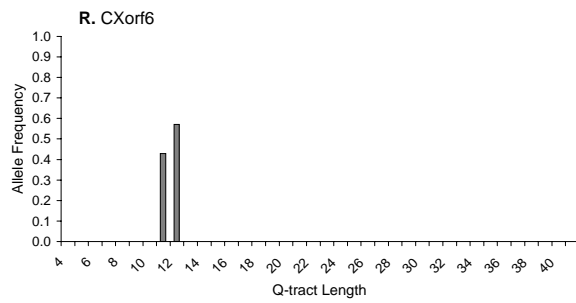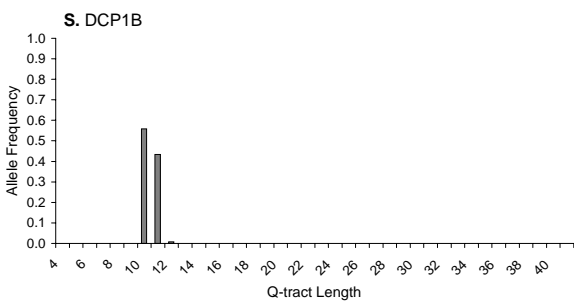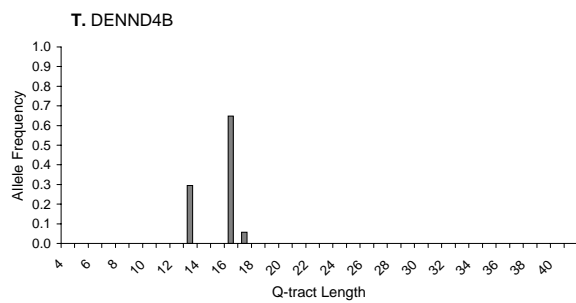

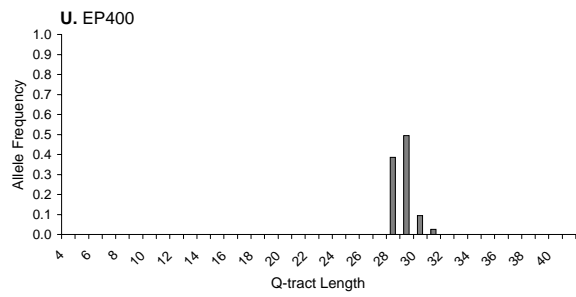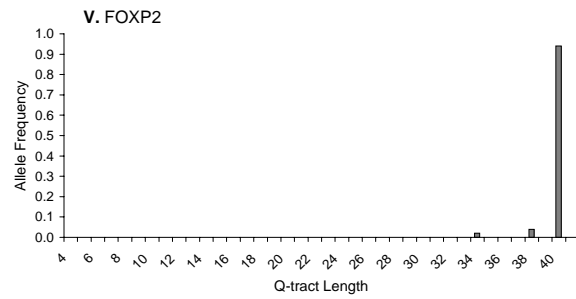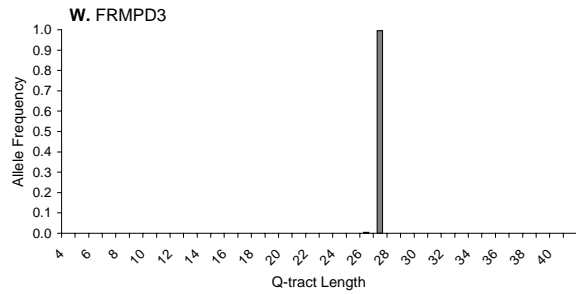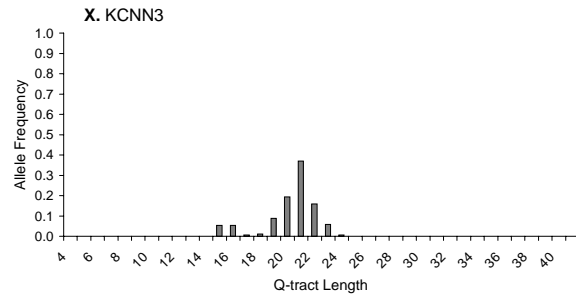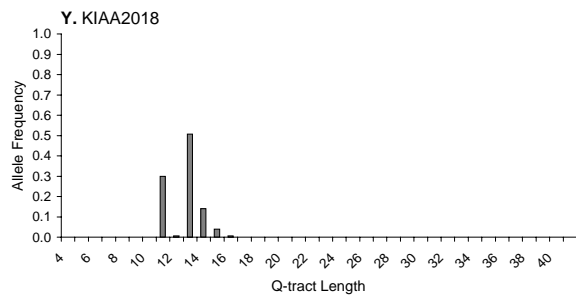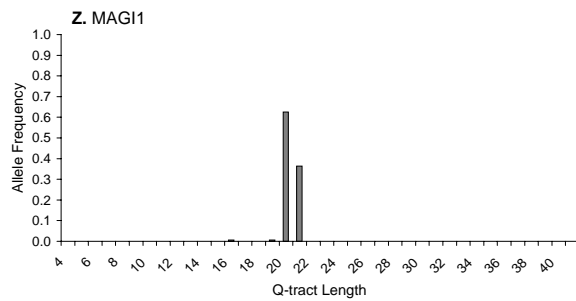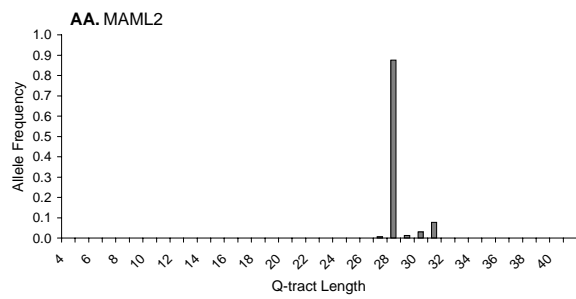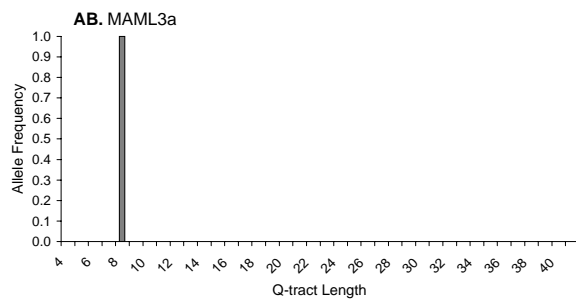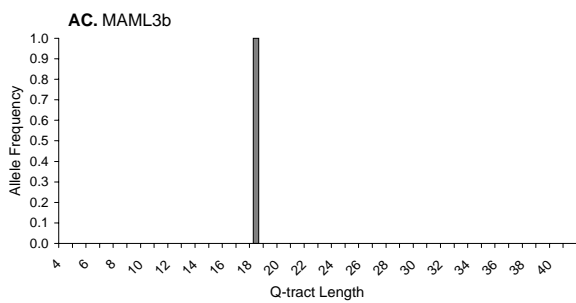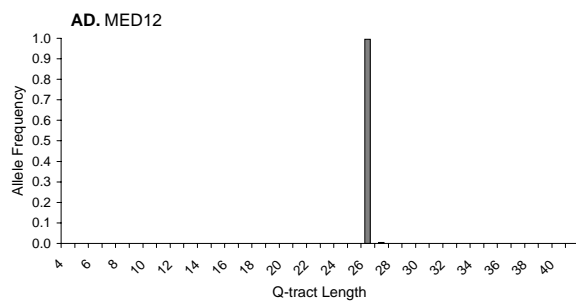

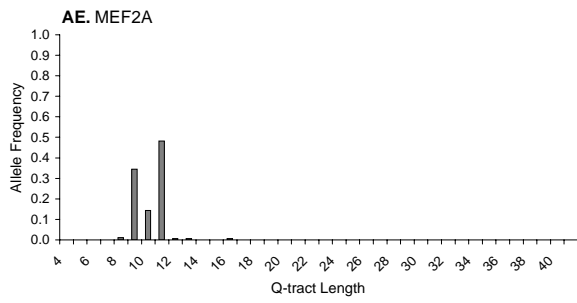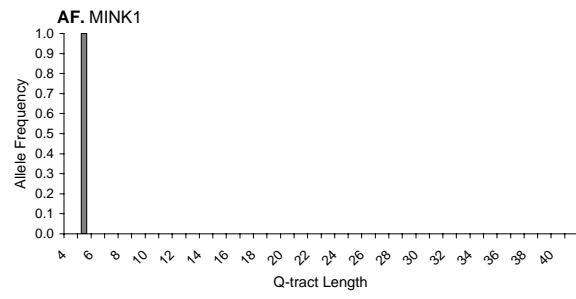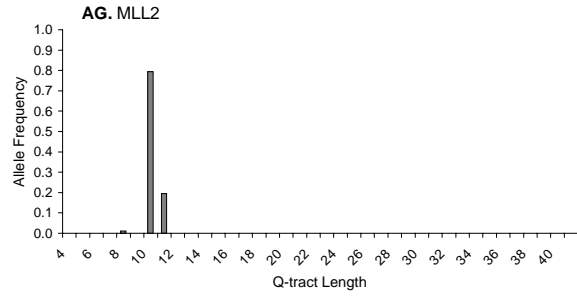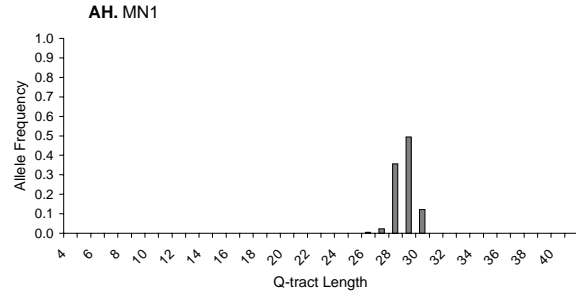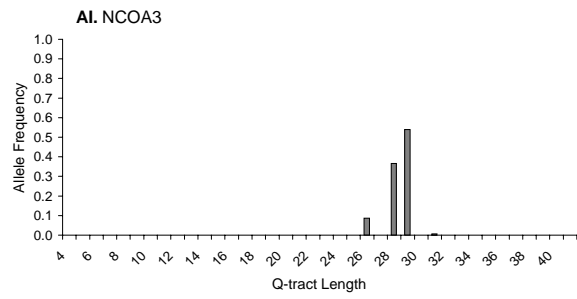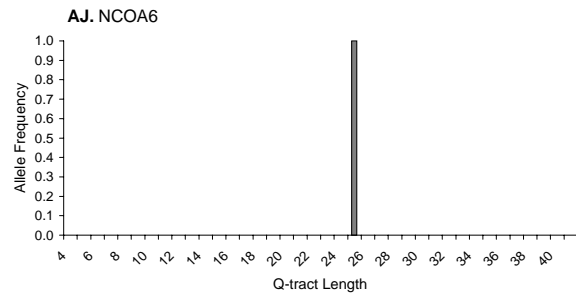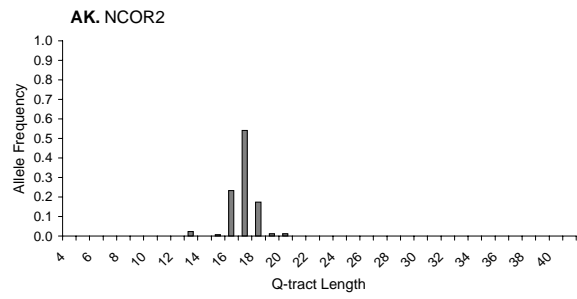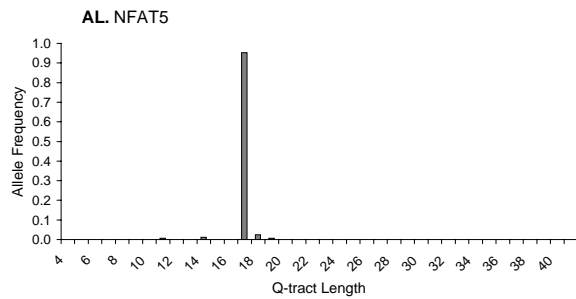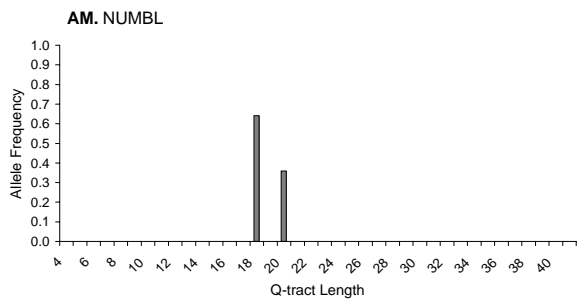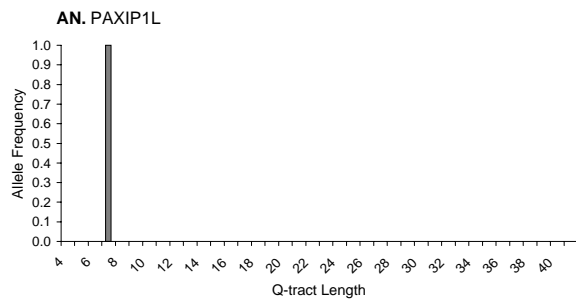

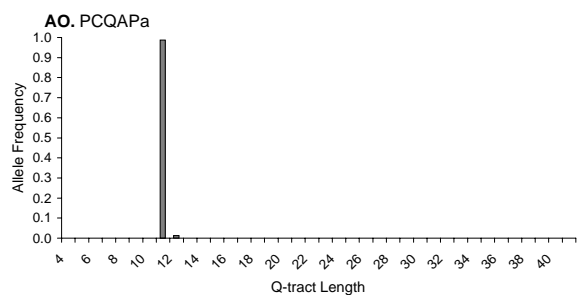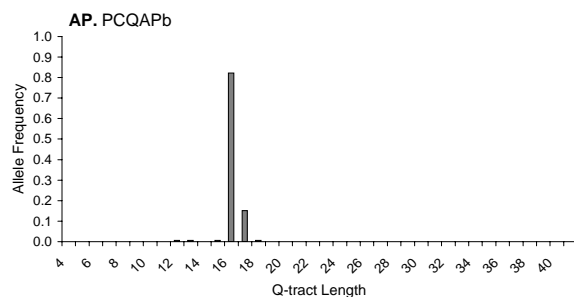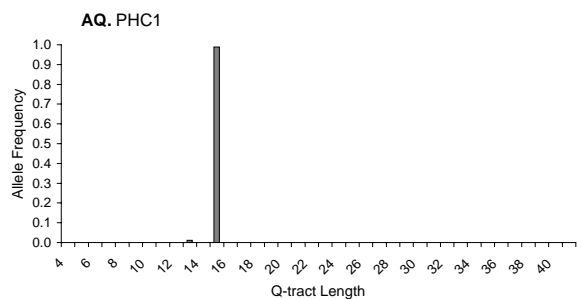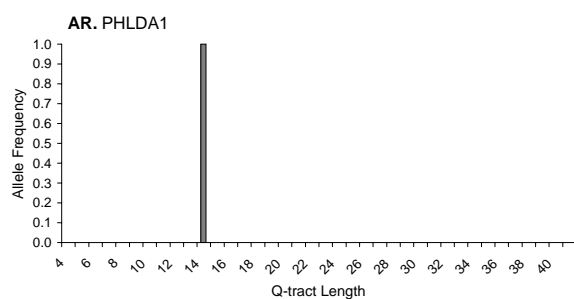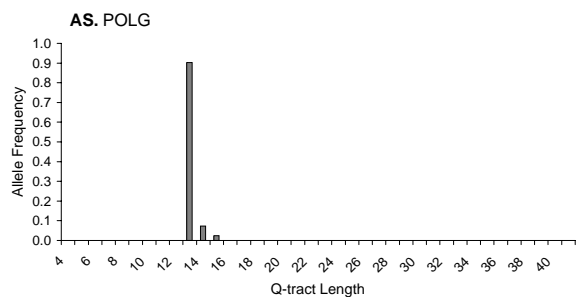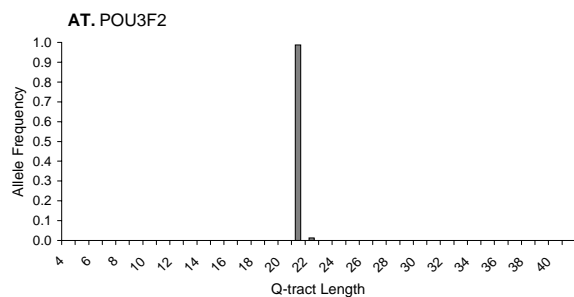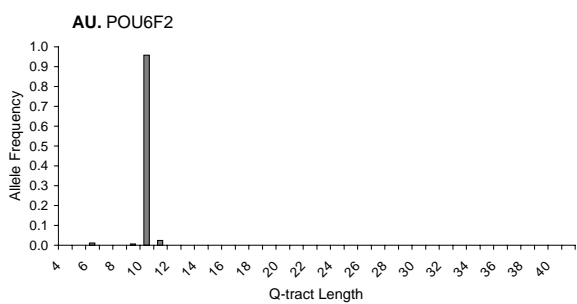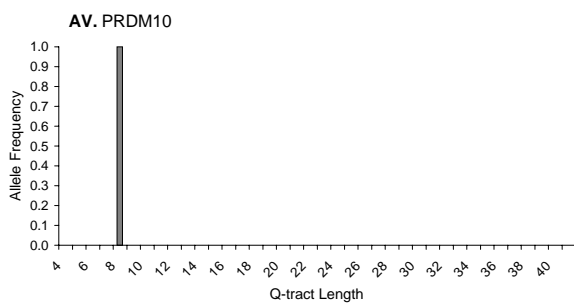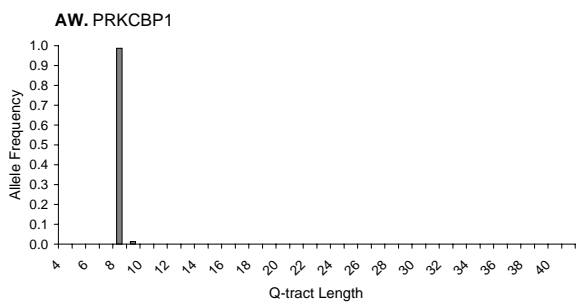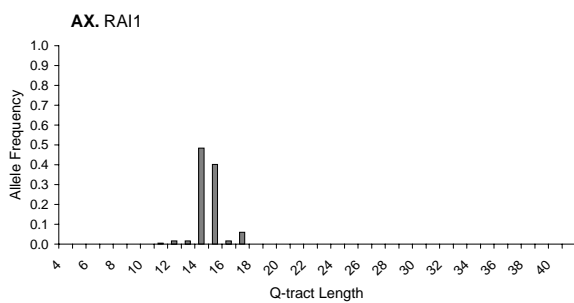

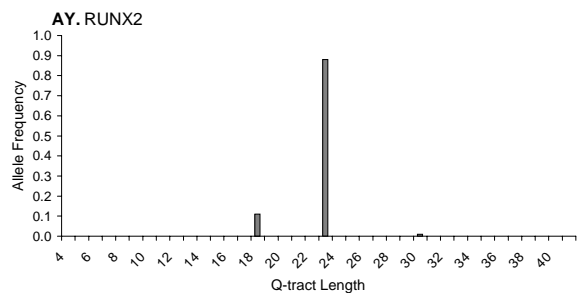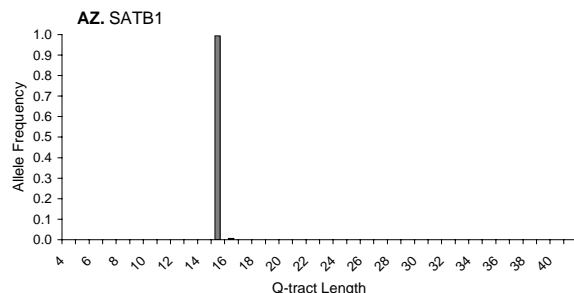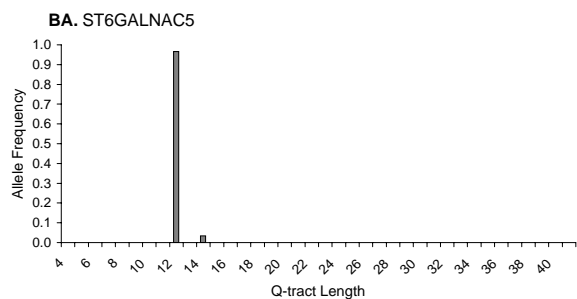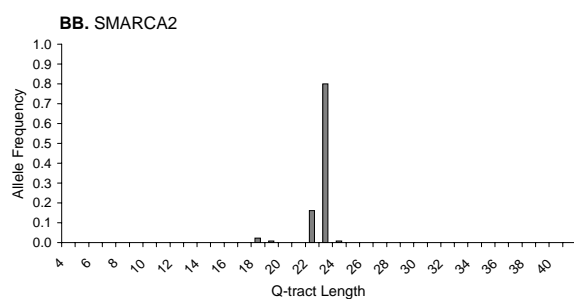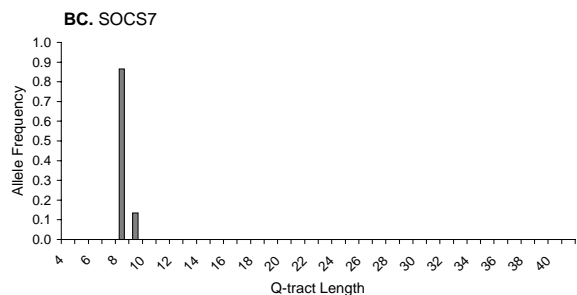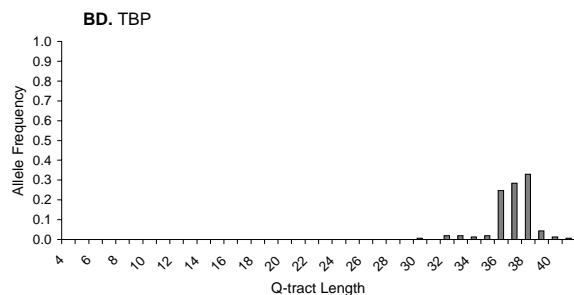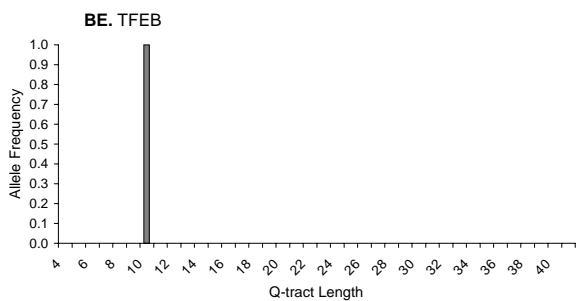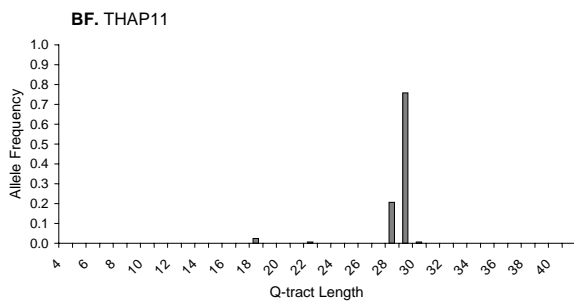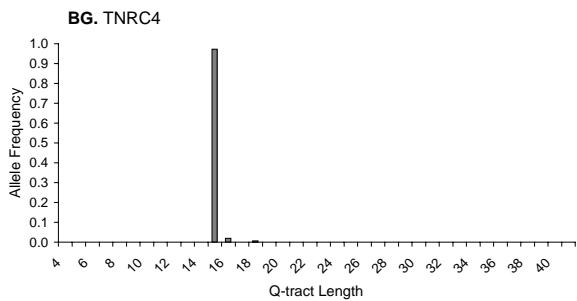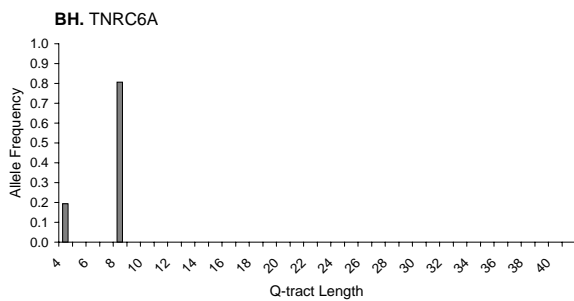

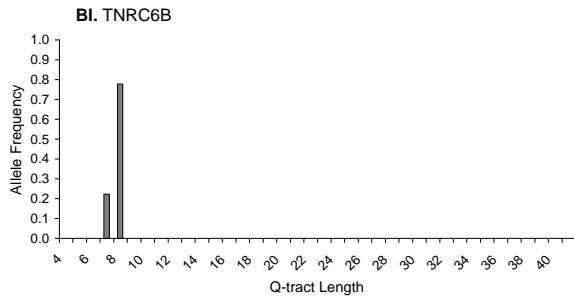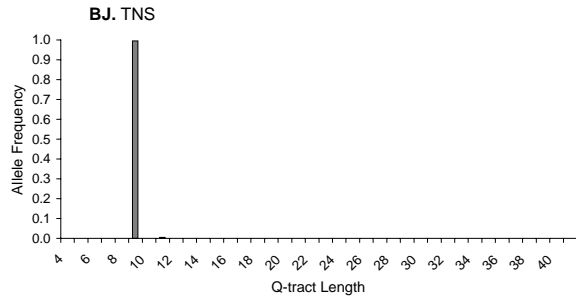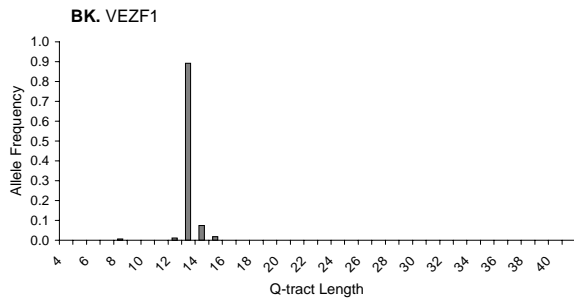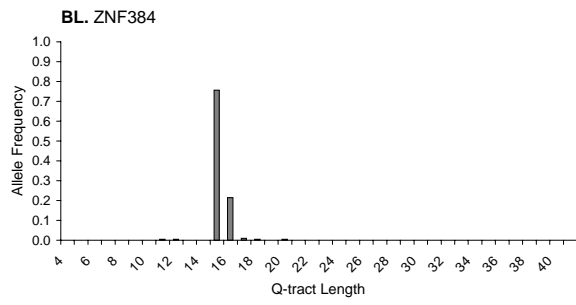

**Additional file 2**
