# Supplementary material for: CAG-encoded polyglutamine length polymorphism in the human genome
Source: PubMed Central journal article supplement (PMC1896166; doi:10.1186/1471-2164-8-126), 2007-05-22
Supplement: 1471-2164-8-126-S6.pdf [file 1471-2164-8-126-S6.pdf]

**Additional file 6.** Genes and their shared GO terms under Cellular Component

GO:0005654 nucleoplasm  
ATXN3|NCOA6|SMARCA2

GO:0005667 transcription factor complex  
NCOA6|TBP

GO:0008372 cellular component unknown  
CXORF6|MN1|SOCS7
